# Supplementary material for: Infection-Related Declines in Chill Coma Recovery and Negative Geotaxis in Drosophila melanogaster
Source: PLoS One. 2012 Sep 13;7(9):e41907. doi: 10.1371/journal.pone.0041907 (PMC3441536; doi:10.1371/journal.pone.0041907)
Supplement: Table S1 — Fraction of L. monocytogenes infected and control flies not responding to tactile stimulation 90 minutes post-chill. The number of flies challenged with PBS or L.monocytogenes that did not respond to tactile stimulation following 90 minutes post-chill incubation is recorded. (XLSX) [file pone.0041907.s002.xlsx]

## Sheet: Sheet1
Supplemental Table 1.
Fraction of L. monocytogenes infected and control flies not responding to tactile stimulation 90 minutes post-chill.
	L. monocytogenes			PBS Injected
	Infected			Controls
	Trial1	Trial 2	Trial 3	Trial1	Trial 2	Trial 3
Oregon-R
Day 1	0/41	1/35	2/36	0/39	1/38	0/36
Day 2	0/37	0/42	0/34	1/37	0/37	0/34
Day 3	0/35	1/33	0/31	1/36	0/37	1/35
Day 4	0/37	1/37	1/28	1/37	0/41	0/31
Day 5	4/29	1/29	5/25	0/39	0/41	0/32
w1118
Day 1	1/39	2/36	1/36	0/36	2/37	1/38
Day 2	2/39	2/38	2/37	0/41	0/38	0/36
Day 3	1/41	1/34	0/32	0/40	0/42	0/35
Day 4	0/31	2/39	3/34	0/41	0/37	1/36
Day 5	1/36	5/28	0/27	0/34	0/34	0/36
