# Supplementary material for: Infection-Related Declines in Chill Coma Recovery and Negative Geotaxis in Drosophila melanogaster
Source: PLoS One. 2012 Sep 13;7(9):e41907. doi: 10.1371/journal.pone.0041907 (PMC3441536; doi:10.1371/journal.pone.0041907)
Supplement: Table S2 — Fraction of S. pneumoniae infected and control flies not responding to tactile stimulation 90 minutes post-chill. The number of flies challenged with S.pneumoniae that did not respond to tactile stimulation following 90 minutes post-chill incubation is recorded. (XLSX) [file pone.0041907.s003.xlsx]

## Sheet: Sheet1
Supplemental Table 2.
Fraction of S. pneumoniae infected and control flies not responding to tactile stimulation 90 minutes post-chill.
	S. pneumoniae
	Infected
	Trial1	Trial 2	Trial 3
Oregon-R	1/14	3/40	5/41
w1118	3/38	14/40	26/40
	PBS Injected
	Control
	Trial 1	Trial 2	Trial 3
Oregon-R	1/14	0/41	2/47
w1118	1/38	1/33	3/36
